# Supplementary material for: Comparative Analysis of Mass Spectral Similarity Measures on Peak Alignment for Comprehensive Two-Dimensional Gas Chromatography Mass Spectrometry
Source: Hindawi journal article supplement (doi:10.1155/2013/509761), 2013-01-01
Supplement: f1 [file 509761.f1.pdf]

# Comparative Analysis of Mass Spectral Similarity Measures on Peak Alignment for Two-dimensional Gas Chromatography Mass Spectrometry

Seongho Kim<sup>1,\*</sup> and Xiang Zhang<sup>2</sup>

<sup>1</sup>Biostatistics Core, Karmanos Cancer Institute, School of Medicine, Wayne State University,  
Detroit, MI

<sup>2</sup>Department of Chemistry, University of Louisville, Louisville, KY

\*, Corresponding author's email address: kimse@karmanos.org

## Supplementary Information

Table S1. F1 score and AUC of each peak alignment method using Euclidean distance for Data I.

|         |             | Cosine                                    | Pearson's                     | Spearman's      | Partial                       | Part            |
|---------|-------------|-------------------------------------------|-------------------------------|-----------------|-------------------------------|-----------------|
| F1 (%)  | PAS         | 90.23 <sup>*</sup><br>(0.69) <sup>#</sup> | 90.30<br>(0.68)               | 75.82<br>(0.80) | <b>97.24</b><br><b>(0.18)</b> | 94.93<br>(0.23) |
|         | DW-PAS      | 96.18<br>(0.37)                           | 96.18<br>(0.37)               | 91.84<br>(0.51) | <b>97.59</b><br><b>(0.25)</b> | 95.64<br>(0.36) |
|         | $k^{\$}$    | 3                                         | 3                             | 3               | <b>20</b>                     | 5               |
|         | SW-PAD      | 97.36<br>(0.25)                           | <b>97.36</b><br><b>(0.24)</b> | 93.61<br>(0.51) | 97.31<br>(0.28)               | 70.52<br>(0.39) |
|         | $\rho^{**}$ | 0.8                                       | <b>0.6</b>                    | 0.1             | 0.4                           | 0.1             |
|         | PAM         | <b>97.80</b><br><b>(0.23)</b>             | <b>97.80</b><br><b>(0.23)</b> | 94.19<br>(0.42) | 97.65<br>(0.25)               | 97.00<br>(0.26) |
|         | $w^{##}$    | <b>0.3</b>                                | <b>0.3</b>                    | 0.6             | 0.3                           | 0.1             |
| AUC (%) | PAS         | 93.82                                     | 93.83                         | 83.85           | <b>97.97</b>                  | 96.81           |
|         | DW-PAS      | 94.25                                     | 94.26                         | 86.55           | <b>97.79</b>                  | 96.95           |
|         | SW-PAD      | 96.67                                     | 96.67                         | 95.48           | <b>97.58</b>                  | 77.67           |
|         | PAM         | 95.35                                     | 95.35                         | 85.64           | <b>95.41</b>                  | 95.05           |

<sup>\*</sup>, Mean (%); <sup>#</sup>, Standard error (%); <sup>\$</sup>, the cut-off rank; <sup>\*\*</sup>, the cut-off similarity score; <sup>##</sup>, the weight factor of the mixture similarity score; The numbers in bold and italic indicate the maximum for each of the peak alignment methods.

Table S2. F1 score and AUC of each peak alignment method using Maximum distance for Data I.

|         |             | Cosine                                    | Pearson's                     | Spearman's      | Partial                       | Part            |
|---------|-------------|-------------------------------------------|-------------------------------|-----------------|-------------------------------|-----------------|
| F1 (%)  | PAS         | 90.23 <sup>*</sup><br>(0.69) <sup>#</sup> | 90.30<br>(0.68)               | 75.82<br>(0.80) | <b>97.24</b><br><b>(0.18)</b> | 94.93<br>(0.23) |
|         | DW-PAS      | 96.14<br>(0.37)                           | 96.14<br>(0.37)               | 91.81<br>(0.51) | <b>97.59</b><br><b>(0.25)</b> | 95.72<br>(0.36) |
|         | $k^{\$}$    | 3                                         | 3                             | 3               | <b>20</b>                     | 5               |
|         | SW-PAD      | <b>97.36</b><br><b>(0.25)</b>             | 97.34<br>(0.26)               | 93.56<br>(0.39) | 97.26<br>(0.27)               | 70.52<br>(0.39) |
|         | $\rho^{**}$ | <b>0.8</b>                                | 0.8                           | 0.3             | 0.4                           | 0.1             |
|         | PAM         | <b>97.80</b><br><b>(0.23)</b>             | <b>97.80</b><br><b>(0.23)</b> | 94.19<br>(0.42) | 97.65<br>(0.25)               | 96.99<br>(0.26) |
|         | $w^{##}$    | <b>0.3</b>                                | <b>0.3</b>                    | 0.6             | 0.3                           | 0.1             |
| AUC (%) | PAS         | 93.82                                     | 93.83                         | 83.85           | <b>97.97</b>                  | 96.81           |
|         | DW-PAS      | 94.28                                     | 94.30                         | 86.55           | <b>97.79</b>                  | 96.95           |
|         | SW-PAD      | 95.64                                     | 95.73                         | 94.47           | <b>97.16</b>                  | 77.68           |
|         | PAM         | 95.35                                     | 95.35                         | 85.64           | <b>95.41</b>                  | 95.04           |

<sup>\*</sup>, Mean (%); <sup>#</sup>, Standard error (%); <sup>\$</sup>, the cut-off rank; <sup>\*\*</sup>, the cut-off similarity score; <sup>##</sup>, the weight factor of the mixture similarity score; The numbers in bold and italic indicate the maximum for each of the peak alignment methods.

Table S3. F1 score and AUC of each peak alignment method using Manhattan distance for Data I.

|         |             | Cosine                                    | Pearson's                     | Spearman's      | Partial                       | Part            |
|---------|-------------|-------------------------------------------|-------------------------------|-----------------|-------------------------------|-----------------|
| F1 (%)  | PAS         | 90.23 <sup>*</sup><br>(0.69) <sup>#</sup> | 90.30<br>(0.68)               | 75.82<br>(0.80) | <b>97.24</b><br><b>(0.18)</b> | 94.93<br>(0.23) |
|         | DW-PAS      | 96.04<br>(0.39)                           | 96.04<br>(0.39)               | 91.83<br>(0.51) | <b>97.59</b><br><b>(0.25)</b> | 95.64<br>(0.36) |
|         | $k^{\$}$    | 3                                         | 3                             | 3               | <b>20</b>                     | 5               |
|         | SW-PAD      | 97.36<br>(0.25)                           | <b>97.36</b><br><b>(0.24)</b> | 93.80<br>(0.47) | 97.31<br>(0.28)               | 70.52<br>(0.39) |
|         | $\rho^{**}$ | 0.8                                       | <b>0.6</b>                    | 0.1             | 0.4                           | 0.1             |
|         | PAM         | <b>97.80</b><br><b>(0.23)</b>             | <b>97.80</b><br><b>(0.23)</b> | 94.30<br>(0.41) | 97.65<br>(0.25)               | 96.99<br>(0.26) |
|         | $w^{##}$    | <b>0.3</b>                                | <b>0.3</b>                    | 0.6             | 0.3                           | 0.1             |
|         |             |                                           |                               |                 |                               |                 |
| AUC (%) | PAS         | 93.82                                     | 93.83                         | 83.85           | <b>97.97</b>                  | 96.81           |
|         | DW-PAS      | 94.25                                     | 94.26                         | 86.55           | <b>97.79</b>                  | 96.95           |
|         | SW-PAD      | 96.84                                     | 96.84                         | 95.59           | <b>97.58</b>                  | 77.68           |
|         | PAM         | 95.35                                     | 95.35                         | 85.64           | <b>95.41</b>                  | 95.05           |

<sup>\*</sup>, Mean (%); <sup>#</sup>, Standard error (%); <sup>\$</sup>, the cut-off rank; <sup>\*\*</sup>, the cut-off similarity score; <sup>##</sup>, the weight factor of the mixture similarity score; The numbers in bold and italic indicate the maximum for each of the peak alignment methods.

Table S4. F1 score and AUC of each peak alignment method using Canberra distance for Data I.

|         |             | Cosine                                    | Pearson's                     | Spearman's      | Partial                       | Part            |
|---------|-------------|-------------------------------------------|-------------------------------|-----------------|-------------------------------|-----------------|
| F1 (%)  | PAS         | 90.23 <sup>*</sup><br>(0.69) <sup>#</sup> | 90.30<br>(0.68)               | 75.82<br>(0.80) | <b>97.24</b><br><b>(0.18)</b> | 94.93<br>(0.23) |
|         | DW-PAS      | 90.54<br>(0.67)                           | 90.60<br>(0.66)               | 86.85<br>(0.55) | <b>97.57</b><br><b>(0.22)</b> | 96.54<br>(0.29) |
|         | $k^{\$}$    | 20                                        | 20                            | 3               | <b>10</b>                     | 3               |
|         | SW-PAD      | 97.66<br>(0.26)                           | <b>97.68</b><br><b>(0.26)</b> | 96.47<br>(0.27) | 97.30<br>(0.25)               | 70.50<br>(0.40) |
|         | $\rho^{**}$ | 0.5                                       | <b>0.5</b>                    | 0.1             | 0.4                           | 0.1             |
|         | PAM         | 98.10<br>(0.20)                           | <b>98.12</b><br><b>(0.20)</b> | 97.15<br>(0.26) | 97.89<br>(0.21)               | 97.91<br>(0.24) |
|         | $w^{##}$    | 0.5                                       | <b>0.5</b>                    | 0.95            | 0.6                           | 0.5             |
|         |             |                                           |                               |                 |                               |                 |
| AUC (%) | PAS         | 93.82                                     | 93.83                         | 83.85           | <b>97.97</b>                  | 96.81           |
|         | DW-PAS      | 93.92                                     | 93.93                         | 85.51           | <b>98.24</b>                  | 96.92           |
|         | SW-PAD      | 97.59                                     | 97.82                         | 97.16           | <b>97.99</b>                  | 77.65           |
|         | PAM         | 96.47                                     | 96.42                         | 84.16           | <b>98.10</b>                  | 97.15           |

<sup>\*</sup>, Mean (%); <sup>#</sup>, Standard error (%); <sup>\$</sup>, the cut-off rank; <sup>\*\*</sup>, the cut-off similarity score; <sup>##</sup>, the weight factor of the mixture similarity score; The numbers in bold and italic indicate the maximum for each of the peak alignment methods.

Table S5. F1 score and AUC of each peak alignment method using Euclidean distance for Data II.

|         |             | Cosine                                    | Pearson's       | Spearman's      | Partial                       | Part            |
|---------|-------------|-------------------------------------------|-----------------|-----------------|-------------------------------|-----------------|
| F1 (%)  | PAS         | 61.09 <sup>*</sup><br>(0.31) <sup>#</sup> | 61.17<br>(0.30) | 49.31<br>(0.25) | <b>61.58</b><br><b>(0.87)</b> | 58.52<br>(0.85) |
|         | Rank        |                                           |                 |                 | <b>30</b>                     | 5               |
|         | DW-PAS      | <b>59.15</b><br><b>(0.35)</b>             | 59.09<br>(0.35) | 56.72<br>(0.32) | 59.12<br>(1.09)               | 57.54<br>(1.05) |
|         | $k^{\$}$    | <b>20</b>                                 | 20              | 10              | 20                            | 20              |
|         | $q^{**}$    |                                           |                 |                 | 30                            | 3               |
|         | SW-PAD      | 59.47<br>(0.42)                           | 59.30<br>(0.39) | 55.97<br>(0.39) | <b>66.60</b><br><b>(0.79)</b> | 57.96<br>(0.78) |
|         | $\rho^{##}$ | 0.93                                      | 0.93            | 0.3             | <b>0.7</b>                    | 0.1             |
|         | $q$         |                                           |                 |                 | <b>50</b>                     | 100             |
|         | PAM         | 61.48<br>(0.31)                           | 61.51<br>(0.33) | 59.29<br>(0.30) | <b>61.78</b><br><b>(0.91)</b> | 60.19<br>(1.00) |
|         | $w^{\$}$    | 0.05                                      | 0.05            | 0.1             | <b>0.1</b>                    | 0.5             |
|         | $q$         |                                           |                 |                 | <b>30</b>                     | 3               |
| AUC (%) | PAS         | 84.53                                     | 84.55           | 72.55           | <b>85.07</b>                  | 83.16           |
|         | DW-PAS      | <b>81.50</b>                              | 81.50           | 80.26           | 81.23                         | 80.59           |
|         | SW-PAD      | 78.04                                     | 78.36           | 77.71           | <b>82.81</b>                  | 75.35           |
|         | PAM         | 76.89                                     | 76.89           | 76.77           | <b>77.45</b>                  | 77.16           |

<sup>\*</sup>, Mean (%); <sup>#</sup>, Standard error (%); <sup>\$</sup>, the cut-off rank; <sup>\*\*</sup>, the rank for the two-step partial and part correlations; <sup>##</sup>, the cut-off similarity score; <sup>\$\$</sup>, the weight factor of the mixture similarity score; The numbers in bold and italic indicate the maximum for each of the peak alignment methods.

Table S6. F1 score and AUC of each peak alignment method using Maximum distance for Data II.

|         |             | Cosine                                    | Pearson's       | Spearman's      | Partial                       | Part            |
|---------|-------------|-------------------------------------------|-----------------|-----------------|-------------------------------|-----------------|
| F1 (%)  | PAS         | 61.09 <sup>*</sup><br>(0.31) <sup>#</sup> | 61.17<br>(0.30) | 49.31<br>(0.25) | <b>61.58</b><br><b>(0.87)</b> | 58.52<br>(0.85) |
|         | Rank        |                                           |                 |                 | <b>30</b>                     | 5               |
|         | DW-PAS      | <b>59.24</b><br><b>(0.36)</b>             | 59.16<br>(0.36) | 56.71<br>(0.31) | 59.23<br>(1.01)               | 57.59<br>(1.12) |
|         | $K^{\$}$    | <b>20</b>                                 | 20              | 10              | 20                            | 20              |
|         | $q^{**}$    |                                           |                 |                 | 50                            | 3               |
|         | SW-PAD      | 59.26<br>(0.44)                           | 59.10<br>(0.41) | 55.62<br>(0.40) | <b>66.47</b><br><b>(0.84)</b> | 57.86<br>(0.80) |
|         | $\rho^{##}$ | 0.93                                      | 0.93            | 0.3             | <b>0.7</b>                    | 0.1             |
|         | $q$         |                                           |                 |                 | <b>50</b>                     | 100             |
|         | PAM         | 61.48<br>(0.31)                           | 61.51<br>(0.33) | 59.29<br>(0.30) | <b>61.78</b><br><b>(0.91)</b> | 60.19<br>(1.00) |
|         | $w^{\$\$}$  | 0.05                                      | 0.05            | 0.1             | <b>0.1</b>                    | 0.5             |
|         | $q$         |                                           |                 |                 | <b>30</b>                     | 3               |
| AUC (%) | PAS         | 84.53                                     | 84.55           | 72.55           | <b>85.07</b>                  | 83.16           |
|         | DW-PAS      | <b>81.14</b>                              | 81.14           | 79.64           | 81.00                         | 80.23           |
|         | SW-PAD      | 77.42                                     | 77.81           | 77.18           | <b>82.51</b>                  | 75.31           |
|         | PAM         | 76.89                                     | 76.89           | 76.77           | <b>77.45</b>                  | 77.14           |

<sup>\*</sup>, Mean (%); <sup>#</sup>, Standard error (%); <sup>\$</sup>, the cut-off rank; <sup>\*\*</sup>, the rank for the two-step partial and part correlations; <sup>##</sup>, the cut-off similarity score; <sup>\$\$</sup>, the weight factor of the mixture similarity score; The numbers in bold and italic indicate the maximum for each of the peak alignment methods.

Table S7. F1 score and AUC of each peak alignment method using Manhattan distance for Data II.

|         |             | Cosine                                    | Pearson's       | Spearman's      | Partial                       | Part            |
|---------|-------------|-------------------------------------------|-----------------|-----------------|-------------------------------|-----------------|
| F1 (%)  | PAS         | 61.09 <sup>*</sup><br>(0.31) <sup>#</sup> | 61.17<br>(0.30) | 49.31<br>(0.25) | <b>61.58</b><br><b>(0.87)</b> | 58.52<br>(0.85) |
|         | Rank        |                                           |                 |                 | <b>30</b>                     | 5               |
|         | DW-PAS      | 59.15<br>(0.34)                           | 59.08<br>(0.35) | 56.68<br>(0.33) | <b>59.15</b><br><b>(0.96)</b> | 57.44<br>(1.03) |
|         | $k^{\$}$    | 20                                        | 20              | 10              | <b>20</b>                     | 15              |
|         | $q^{**}$    |                                           |                 |                 | <b>70</b>                     | 3               |
|         | SW-PAD      | 59.54<br>(0.41)                           | 59.38<br>(0.39) | 56.32<br>(0.37) | <b>66.65</b><br><b>(0.77)</b> | 57.96<br>(0.75) |
|         | $\rho^{##}$ | 0.93                                      | 0.93            | 0.3             | <b>0.7</b>                    | 0.1             |
|         | $q$         |                                           |                 |                 | <b>50</b>                     | 100             |
|         | PAM         | 61.48<br>(0.31)                           | 61.49<br>(0.33) | 59.27<br>(0.30) | <b>61.78</b><br><b>(0.91)</b> | 60.19<br>(1.00) |
|         | $w^{\$\$}$  | 0.05                                      | 0.05            | 0.1             | <b>0.1</b>                    | 0.5             |
|         | $q$         |                                           |                 |                 | <b>30</b>                     | 3               |
| AUC (%) | PAS         | 84.53                                     | 84.55           | 72.55           | <b>85.07</b>                  | 83.16           |
|         | DW-PAS      | <b>81.66</b>                              | 81.66           | 80.57           | 81.46                         | 80.84           |
|         | SW-PAD      | 78.06                                     | 78.34           | 77.77           | <b>82.90</b>                  | 75.35           |
|         | PAM         | 76.87                                     | 76.87           | 76.79           | <b>77.45</b>                  | 77.18           |

<sup>\*</sup>, Mean (%); <sup>#</sup>, Standard error (%); <sup>\$</sup>, the cut-off rank; <sup>\*\*</sup>, the rank for the two-step partial and part correlations; <sup>##</sup>, the cut-off similarity score; <sup>\$\$</sup>, the weight factor of the mixture similarity score; The numbers in bold and italic indicate the maximum for each of the peak alignment methods.

Table S8. F1 score and AUC of each peak alignment method using Canberra distance for Data II.

|         |             | Cosine                                    | Pearson's       | Spearman's      | Partial                       | Part            |
|---------|-------------|-------------------------------------------|-----------------|-----------------|-------------------------------|-----------------|
| F1 (%)  | PAS         | 61.09 <sup>*</sup><br>(0.31) <sup>#</sup> | 61.17<br>(0.30) | 49.31<br>(0.25) | <b>61.58</b><br><b>(0.87)</b> | 58.52<br>(0.85) |
|         | Rank        |                                           |                 |                 | <b>30</b>                     | 5               |
|         | DW-PAS      | 59.32<br>(0.33)                           | 59.23<br>(0.34) | 56.74<br>(0.32) | <b>59.52</b><br><b>(0.95)</b> | 58.23<br>(1.02) |
|         | $K^{\$}$    | 15                                        | 15              | 5               | <b>20</b>                     | 15              |
|         | $q^{**}$    |                                           |                 |                 | <b>50</b>                     | 15              |
|         | SW-PAD      | 59.09<br>(0.38)                           | 58.86<br>(0.37) | 54.83<br>(0.50) | <b>66.28</b><br><b>(0.63)</b> | 57.65<br>(0.67) |
|         | $\rho^{##}$ | 0.93                                      | 0.93            | 0.3             | <b>0.7</b>                    | 0.1             |
|         | $q$         |                                           |                 |                 | <b>50</b>                     | 100             |
|         | PAM         | 61.21<br>(0.32)                           | 61.21<br>(0.32) | 59.42<br>(0.36) | <b>61.73</b><br><b>(0.87)</b> | 59.72<br>(0.91) |
|         | $w^{\$}$    | 0.01                                      | 0.01            | 0.7             | <b>0.1</b>                    | 0.7             |
|         | $q$         |                                           |                 |                 | <b>30</b>                     | 3               |
| AUC (%) | PAS         | 84.53                                     | 84.55           | 72.55           | <b>85.07</b>                  | 83.16           |
|         | DW-PAS      | <b>83.45</b>                              | 83.43           | 81.50           | 83.30                         | 82.71           |
|         | SW-PAD      | 77.52                                     | 77.60           | 77.76           | <b>82.74</b>                  | 75.21           |
|         | PAM         | 80.78                                     | 80.80           | 79.22           | <b>83.42</b>                  | 82.76           |

<sup>\*</sup>, Mean (%); <sup>#</sup>, Standard error (%); <sup>\$</sup>, the cut-off rank; <sup>\*\*</sup>, the rank for the two-step partial and part correlations; <sup>##</sup>, the cut-off similarity score; <sup>\$\$</sup>, the weight factor of the mixture similarity score; The numbers in bold and italic indicate the maximum for each of the peak alignment methods.
